1 **A BioBricks® toolbox for multiplexed metabolic engineering of central carbon**  
2 **metabolism in the tetracenomycin pathway**

3 Jennifer T. Nguyen <sup>1,†</sup>, Kennedy K. Riebschleger <sup>1,†</sup>, Katelyn V. Brown <sup>1,†</sup>, Nina M. Gorgijevska <sup>1</sup>,  
4 and S. Eric Nybo <sup>1,\*</sup>

5 † denotes these authors contributed equally to the work

6 <sup>1</sup> Department of Pharmaceutical Sciences, College of Pharmacy, Ferris State University, Big  
7 Rapids, MI 49307, USA

8 \*Correspondence should be addressed to Prof. Dr. S. Eric Nybo. Email: [EricNybo@Ferris.edu](mailto:EricNybo@Ferris.edu)

9  
10 **ABSTRACT**

11 The tetracenomycins are aromatic anticancer polyketides that inhibit peptide translation  
12 via binding to the large ribosomal subunit. Here, we expressed the elloramycin biosynthetic  
13 gene cluster in the heterologous host *Streptomyces coelicolor* M1146 to facilitate the  
14 downstream production of tetracenomycin analogs. We developed a BioBricks® genetic toolbox  
15 of genetic parts for substrate precursor engineering in *S. coelicolor* M1146::cos16F4iE. We  
16 cloned a series of integrating vectors based on the VWB, TG1, and SV1 integrase systems to  
17 interrogate gene expression in the chromosome. We genetically engineered three separate  
18 genetic constructs to modulate tetracenomycin biosynthesis: 1) the *vhb* hemoglobin from  
19 obligate aerobe *Vitreoscilla stercoraria* to improve oxygen utilization; (2) the *accA2BE* acetyl-  
20 CoA carboxylase to enhance condensation of malonyl-CoA; (3) lastly, the *sco6196*  
21 acyltransferase, which is a “metabolic regulatory switch” responsible for mobilizing  
22 triacylglycerols to  $\beta$ -oxidation machinery for acetyl-CoA. In addition, we engineered the *tcmO* 8-  
23 O-methyltransferase and newly identified *tcmD* 12-O-methyltransferase from *Amycolatopsis* sp.  
24 A23 to generate tetracenomycins C and X. We also co-expressed the *tcmO* methyltransferase  
25 with oxygenase *urdE* to generate the analog 6-hydroxy-tetracenomycin C. Altogether, this

26 system is compatible with the BioBricks® [RFC 10] cloning standard for the co-expression of  
27 multiple gene sets for metabolic engineering of *Streptomyces coelicolor* M1146::cos16F4iE.

28

29 **KEYWORDS**

30 Tetracenomycins, polyketides, *Streptomyces*, metabolic engineering, BioBricks

31

## 32 Introduction

33 The tetracenomycins are a family of aromatic polyketides produced by  
34 *Streptomyces glaucescens* GLA.0 and *Streptomyces olivaceus* Tü2353, respectively  
35 <sup>[1,2]</sup>. 8-demethyltetracenomycin C (8-DMTC, **1**), tetracenomycin C (**2**), tetracenomycin X  
36 (**3**), 6-hydroxy-tetracenomycin C (**4**), and elloramycin (**5**) are structurally representative  
37 compounds from this family (Figure 1). **1 - 5** exhibit antibacterial activity against gram-  
38 positive microorganisms and anticancer activity against a variety of mammalian cancer  
39 cell lines, though **2** and **3** are the most potent compounds described to date <sup>[3,4]</sup>. The  
40 tetracenomycins were previously thought to exhibit a mechanism of action like the  
41 anthracyclines, namely, binding to DNA topoisomerase II and induction of DNA damage  
42 <sup>[3]</sup>. Recently, Osterman and coworkers demonstrated that **3** does not induce DNA  
43 damage, but rather it inhibits peptide translation via binding to the large ribosomal  
44 subunit polypeptide exit channel <sup>[5]</sup>. Impressively, Osterman et al. demonstrated that **3**  
45 binds to the same binding site within the exit channel of the *E. coli* 50S ribosomal  
46 subunit and the *H. sapiens* 60S ribosomal subunit, a stunning display of evolutionarily  
47 conserved molecular recognition that accounts for the cytotoxic activities of the TCMS  
48 <sup>[5]</sup>. This sets the stage for the development of tetracenomycin analogs with improved  
49 potency and anticancer activity.

50 The gene cluster for *Streptomyces glaucescens* GLA.0 was previously  
51 sequenced, revealing the full biosynthetic gene cluster for **1**, spectinomycin, and  
52 acarbose <sup>[6]</sup>. The biosynthesis of **1** has been studied extensively for the past three decades and  
53 has served as a model system for understanding type II polyketide biosynthesis (Figure 2) <sup>[7-11]</sup>.  
54 Decker et al. previously isolated the gene cluster for elloramycin biosynthesis and cloned it onto  
55 cosmid cos16F4 <sup>[12]</sup>. Heterologous expression of cosmid cos16F4 resulted in heterologous

56 production of **1** and production of penultimate intermediate tetracenomycin A2 (Figure 2).  
57 Cosmid cos16F4 was also discovered to encode the *elmGT* gene, which encodes the  
58 glycosyltransferase responsible for the transfer of TDP-L-rhamnose to the 8-position of **1** <sup>[13]</sup>.  
59 ElmGT has been shown to exhibit donor substrate flexibility towards >20 TDP-deoxysugar  
60 donors <sup>[14–20]</sup>. Therefore, ElmGT and the cos16F4 heterologous expression system are  
61 significant tools for the generation of a library of tetracenomycin analogs. These tetracenomycin  
62 analogs will be instrumental in investigating the anticancer mechanism of action activity for this  
63 class of compounds and the role of the carbohydrate moiety in binding to the large mammalian  
64 ribosomal subunit.

65 The heterologous expression of extrachromosomal sequences in *Streptomyces spp.* is  
66 subject to genetic instability <sup>[21]</sup>. As an alternative approach, cloning of genes via the well-  
67 characterized actinophage integrases (e.g. fC31, fBT1, SV1, TG1, SAM2, VWB) into *attB* sites  
68 in the *Streptomyces spp.* chromosome can result in the stable incorporation of heterologously  
69 expressed genes <sup>[22]</sup>. Therefore, we incorporated the elloramycin biosynthetic gene cluster  
70 encoded on the C31-integrating cassette cos16F4iE into the genome of the superhost  
71 *Streptomyces coelicolor* M1146. *Streptomyces coelicolor* M1146 has been genome minimalized  
72 for the removal of the actinorhodin, undecylprodigiosin, coelimycin P1, and the calcium-  
73 dependent antibiotic gene clusters <sup>[23]</sup>. Therefore, *S. coelicolor* M1146 exhibits fungible  
74 metabolism that can be channeled towards the synthesis of natural products through the  
75 heterologous expression of biosynthetic gene clusters (BGCs).

76 In this work, we developed a BioBricks® [RFC 10] biosynthetic toolbox for the  
77 engineering of central carbon metabolism in elloramycin biosynthesis. First, we engineered the  
78 cos16F4iE cluster into *Streptomyces coelicolor* M1146 to generate an improved production host  
79 for tetracenomycins, as compared to the original *Streptomyces lividans* TK24 (cos16F4) host. In  
80 addition, we generated integrating plasmid cassettes based on plasmids pENSV1, pENTG1,

81 and pOSV808 vectors to site-specifically introduce genes into the SV1, TG1, and VWB  
82 actinophage *attB* sites, respectively <sup>[24–27]</sup>. Using these multiplexed integrating vectors, we  
83 engineered three different gene cassettes into different genomic loci to determine the optimal  
84 arrangement for enhancement of tetracenomycin production and biomass accumulation. First,  
85 we engineered the *vhb* hemoglobin gene from *Vitreoscilla stercoraria* to enhance aerobic  
86 respiration of *S. coelicolor* M1146::cos16F4iE in shake flasks <sup>[28,29]</sup>. Secondly, we engineered  
87 the acetyl-CoA carboxylase *accA2BE* operon from *S. coelicolor* M145 under the control of the  
88 constitutive *ermE*\**p* promoter to enhance the production of malonyl-CoA <sup>[30]</sup>. Thirdly, we  
89 engineered the *sco6196* acyltransferase, previously identified as a “metabolic switch” during the  
90 transition from triacylglycerol synthesis to polyketide biosynthesis in the stationary phase <sup>[31]</sup>.  
91 Overexpression of the *accA2BE* operon and *sco6196* metabolic switches resulted in a 3-fold  
92 improvement in **1** production titer, as compared to the original production host. Finally, we  
93 utilized the improved production host expressing the *accA2BE* operon to engineer in the *tcmO*  
94 8-*O*-methyltransferase and the *tcmD* 12-*O*-methyltransferase from *Amycolatopsis sp. A23* to  
95 biosynthesize tetracenomycin C and tetracenomycin X. To the best of our knowledge, this is the  
96 first report to describe the functional characterization of *tcmO* and *tcmD* in the biosynthesis of  
97 tetracenomycin X.

98

## 99 **Materials and Methods**

### 100 *Bacterial strains and growth conditions*

101 *E. coli* JM109 and *E. coli* ET12567 were grown at 37°C in LB broth or LB agar as  
102 previously described <sup>[32]</sup>. *E. coli* JM109 was used for plasmid propagation and subcloning, while  
103 *E. coli* ET12567/pUZ8002 was used as the conjugation donor host for mobilizing expression  
104 vectors into *Streptomyces coelicolor* M1146 as previously described <sup>[33]</sup>. (When appropriate,  
105 ampicillin (100 µg mL<sup>-1</sup>), kanamycin (25 µg mL<sup>-1</sup>), apramycin (25 µg mL<sup>-1</sup>), viomycin (30 µg mL<sup>-1</sup>)

106 <sup>1</sup>), hygromycin (50 µg mL<sup>-1</sup>), and nalidixic acid (35 µg mL<sup>-1</sup>) were supplemented to media to  
107 select for recombinant microorganisms.

108 *Streptomyces coelicolor* M1146 and derivative strains were routinely maintained on  
109 Soya-Mannitol Flour (SFM) agar supplemented with 10 mM MgCl<sub>2</sub> and International  
110 Streptomyces Project medium #4 (ISP4) (BD Difco) at 30°C as described previously <sup>[34]</sup>. For  
111 liquid culturing, *Streptomyces coelicolor* M1146::cos16F4iE derivative strains were grown in  
112 TSB media for the production of seed culture and modified SG-TES liquid medium (soytone 10  
113 g, glucose 20 g, yeast extract 5 g, TES free acid 5.73 g, CoCl<sub>2</sub> 1 mg, per liter) <sup>[17]</sup>. All media and  
114 reagents were purchased from Thermo-Fisher Scientific.

115

#### 116 *General genetic manipulations*

117 Routine genetic cloning and plasmid manipulation were carried out in *E. coli* JM109  
118 (New England Biolabs). *E. coli* ET12567/pUZ8002 was used as the host for intergeneric  
119 conjugation with *Streptomyces coelicolor* as previously described <sup>[34]</sup>. *E. coli* chemically  
120 competent cells were prepared using the Mix and Go! *E. coli* Transformation Kit® (Zymo  
121 Research). *E. coli* was transformed with plasmid DNA via chemically competent heat-shock  
122 transformation as described previously <sup>[32]</sup>. Plasmid DNA was isolated via the Wizard® Plus SV  
123 Minipreps DNA Purification System by following the manufacturer's protocols (Promega). All  
124 molecular biology reagents and enzymes used for plasmid construction were purchased from  
125 New England Biolabs.

126 BioBricks® parts were constructed to adhere to the BioBrick RFC[10] standard as  
127 previously described <sup>[35]</sup>. For the construction of BioBrick® vectors, plasmids pSB1A3-J04450,  
128 pSB1K3-J04450, pSB1C3-J04450, pSB1T3-J04450 were used as previously described <sup>[36]</sup>. In  
129 brief, these vectors encode the BBa\_J04450 red fluorescent protein (RFP) coding device, which  
130 consists of the LacI promoter, the B0034 strong ribosome binding site, the monomeric red

131 fluorescent protein from *Discosoma striata* (mRFP1), and the B0015 transcriptional terminator.  
132 *E. coli* JM109 strains transformed with these vectors develop a red color after approximately 18  
133 hours, which indicates the presence of the RFP coding device. pSB1A3-J04450, pSB1K3-  
134 J04450, pSB1C3-J04450, pSB1T3-J04450 were restriction digested with *EcoRI/PstI* and treated  
135 with recombinant shrimp alkaline phosphatase, and used directly for subcloning without gel  
136 purification. In general, “5'-BioBricks® parts” were digested with *EcoRI/SpeI*, “3'-BioBricks®  
137 parts” were digested with *XbaI/PstI*, and these were spliced together in a three-way ligation (3A  
138 cloning) into a destination vector part with a different drug resistance marker <sup>[36]</sup>. BioBricks®  
139 parts were spliced into the digested vectors, transformed into *E. coli* JM109 competent cells,  
140 and plated on LB agar with antibiotics. In a manner analogous to blue-white colony screening,  
141 colonies that turned white contained the genes of interest, whereas colonies that turned red  
142 were still expressing the RFP-coding device. Gene cassettes were assembled in pSB1A3,  
143 pSB1C3, pSB1K3, or pSB1T3 before restriction digestion with *EcoRI/PstI* and ligation to the  
144 same sites of pENSV1 or pENBT1, or with *XbaI/SpeI* and ligation into the *NheI/SpeI* sites of  
145 pOSV808 via isocaudomer cloning <sup>[37]</sup>.

146 The *vhb*, *sco691*, *accA2BE* genes and *ermE*\**p* promoter were codon-optimized and  
147 synthesized as BioBricks® lacking internal *EcoRI*, *PstI*, *SpeI*, and *XbaI* restriction sites  
148 (Supplementary Information) (Genscript). The *ermE*\**p* promoter fragment was restriction  
149 digested with *EcoRI/PstI* and ligated into the *EcoRI/PstI* sites of pSB1C3. Expression vectors  
150 pENSV1 and pENTG1 were generated as synthetic vectors in a pUC57-mini backbone  
151 expressing an origin of transfer sequence (*oriT*), orthogonal actinophage integrase, and drug  
152 resistance marker for selection in *Streptomyces coelicolor* M1146 (Supplementary Information).  
153 pOSV808 was a gift from Jean-Luc Pernodet (Addgene plasmid # 126601 ;  
154 <http://n2t.net/addgene:126601> ; RRID:Addgene\_126601).

155

156 *Intergeneric conjugation between E. coli and S. coelicolor*

157           The conjugation donor host *E. coli* ET12567/pUZ8002 was transformed with constructs  
158 for mobilization into *Streptomyces coelicolor* M1146::cos16F4iE, as previously described [8].  
159 *Streptomyces coelicolor* recipient strains were grown on SFM agar plates for 5 days to achieve  
160 sporulation. In brief, *E. coli* ET12567/pUZ8002 derivative strains harboring expression  
161 constructs for conjugation were grown overnight at 37°C in 3 mL of LB liquid media in an orbital  
162 shaker. The cultures were centrifuged at 4000 x g for 10 minutes and resuspended in 2 mL of  
163 sterile LB media to remove antibiotics. This procedure was repeated twice. In parallel, 3 mL of  
164 sterile TSB was added to one plate of well-sporulated *S. coelicolor*, and the spores were gently  
165 rubbed off the plate with a sterile spreader and collected in a sterile 15 mL conical centrifuge  
166 tube. The spores were heat-shocked at 50°C for 10 minutes and recovered on ice for 10  
167 minutes. 100 µL of spores were mixed with 100 µL of *E. coli* ET12567/pUZ8002 donor cells on  
168 SFM media, plated with a sterile spreader, and allowed to dry in a laminar flow hood. The  
169 conjugal matings were then incubated at 30°C for 16-20 hours before flooding with 1.0 mL  
170 sterile ddH<sub>2</sub>O, nalidixic acid (35 µg mL<sup>-1</sup>), and the appropriate antibiotic(s) for selection of *S.*  
171 *coelicolor* exconjugants. For each transformation, 9 to 12 independent exconjugants were  
172 plated to DNA plates supplemented with antibiotics and grown for 4 to 5 days until the formation  
173 of vegetative mycelium.

174

#### 175 *Production of tetracenomycins and HPLC-MS analysis*

176           For tetracenomycin production experiments, 9 to 12 recombinant *S. coelicolor*  
177 exconjugants were plated on ISP4 plates with appropriate antibiotics for 4 to 5 days until the  
178 formation of vegetative mycelium. For seed culture fermentations, sterile 15 mL culture tubes  
179 (Fisher Scientific) were filled with 2 mL TSB liquid media and inoculated with freshly grown  
180 spores (10% v/v), and grown for 2 days. For time-course experiments, sterile 250 mL  
181 Erlenmeyer flasks were filled with 25 mL SG-TES liquid media and sterile glass beads (3 mm,  
182 10-20 beads per flask) to inhibit mycelial aggregation. The shake flask fermentations were



183 inoculated with 1 mL seed culture (4% v/v) and grown in an orbital shaker for 5 days. Biomass  
184 measurements were recorded using the BugLabs BEH100-Handheld OD scanner, as previously  
185 described <sup>[38]</sup>. The BugLabs BEH100-Handheld OD scanner is a non-invasive optical sensor and  
186 emits signals at 850 nm to detect light reflected from cells in the vessel. Experimental  
187 determinations were determined based on data obtained from 4 – 6 replicates grown on  
188 different days. Data were plotted in figures and independent T-tests were carried out in the  
189 GraphPad Prism® 9 Software suite (GraphPad Software, San Diego, CA). 25 mL of cell culture  
190 was extracted 1:1 with 25 mL of 0.1% formic acid: ethyl acetate and the organic phase was  
191 dried down, resuspended in 4 mL of methanol, and filtered through a 0.45 µm nylon syringe-  
192 driven filter.

193         Analyses and quantification of **1 – 4** were carried out on an Agilent 1260 Infinity II  
194 LC/MSD iQ single quadrupole instrument. In brief, 10 µL of the sample was injected via an  
195 autosampler onto the sample loop and was separated on a Poroshell 120 Phenyl-Hexyl Column  
196 (ID 2.7 µm, 4.6 mm x 100 mm) and was analyzed in gradients of solvent A (0.1% formic acid in  
197 water) and solvent B (0.1% formic acid in acetonitrile). The HPLC program used a constant flow  
198 rate of 0.5 mL per minute and the following gradient steps: 0 minutes, 95% solvent A and 5%  
199 solvent B; 0 – 10 minutes, 95% solvent A and 5% solvent B to 5% solvent A and 95% solvent B;  
200 10 – 13 minutes, held at 5% solvent A and 95% solvent B; 13.1 minutes, re-equilibrate to 95%  
201 solvent A and 5% solvent B; 13.1 – 15.1 minutes, 95% solvent A and 5% solvent B. The diode  
202 array detector (DAD) was set to monitor UVvis absorbance at 290 nm and 410 nm (i.e. which is  
203 selective for tetracenomycins). The ESI-MS was set to scan from 200 *m/z* – 500 *m/z* fragments  
204 in positive and negative ionization modes. Single ion monitoring was set-up in ESI-MS negative  
205 ionization mode using the following ions: **1** = [M-H] = 457 *m/z*; **2** = [M-H] = 471 *m/z*; **3** = [M-H] =  
206 485 *m/z*; **4** = [M-H] = 487 *m/z*. All biosynthetic samples were compared to authentic standards  
207 of **1 – 4**.

208

209

## 210 **Results**

### 211 ***Heterologous expression of cos16F4iE in Streptomyces coelicolor M1146***

212 Initially, we sought to generate an improved host for improved production of **1** and **5**  
213 analogs for downstream antiproliferative activity and drug metabolism studies. The initial host  
214 *Streptomyces lividans* TK24 (cos16F4) was based on a pKC505-based cosmid expression  
215 system that resulted in the production of 8-DMTC and tetracenomycin B3 at a yield of  
216 approximately 15 – 20 mg/L<sup>[12]</sup>. We routinely worked with this host to generate novel  
217 glycosylated tetracenomycins via co-expression of “deoxysugar plasmids” that could direct the  
218 biosynthesis of TDP-deoxysugars for glycosylation onto the 8-DMTC aglycone via ElmGT. In  
219 our hands, the *S. lividans* TK24 (cos16F4) expression host would experience segregation of  
220 cos16F4 or “deoxysugar plasmids” during scaled-up fermentations to isolate new  
221 tetracenomycin analogs<sup>[17]</sup>.

222 We obtained the integrating vector cos16F4iE for introduction in the improved  
223 heterologous expression host *S. coelicolor* M1146. The vector cos16F4iE features the  $\phi$ C31  
224 integrase and *attP* attachment site for recombination into the *attB* site of the *S. coelicolor*  
225 chromosome. Integration of this cassette could ensure stable expression of the core 8-DMTC  
226 biosynthetic genes and could avoid the instability issues observed previously with *S. lividans*  
227 TK24 (cos16F4). The *Streptomyces coelicolor* M1146 expression host has several advantages  
228 over *S. lividans* TK24, including deletion of four major biosynthetic gene clusters, resulting in a  
229 host with fungible metabolism for heterologous expression of type II polyketide synthase gene  
230 clusters<sup>[23]</sup>. Introduction of cos16F4iE into *S. coelicolor* M1146 via intergeneric conjugation  
231 resulted in several apramycin-resistant exconjugants that produced an orange-red pigmented  
232 color when plated on SFM agar. 12 independent clones were grown up for 5 days and  
233 extracted. The methanolic extracts for all twelve strains indicated significant production of **1** and  
234 tetracenomycin B3, as compared to an authentic standard of **1** ( $t_R = 8.76$  min)<sup>[12]</sup>. The yield of **1**

235 from the clones ranged from 100 – 160 mg/L, which is a 5 to 8-fold improvement over the  
236 original production host. One high-producing clone was carried forward for further experiments.

237  
238 ***Development of Orthogonal BioBrick® Vectors for Integration in Streptomyces coelicolor***

239 Next, we set out to develop a set of orthogonal BioBrick® [RFC-10] vectors for  
240 integration of gene cassettes into the chromosome of *Streptomyces coelicolor*  
241 M1146::cos16F4iE. We designed new BioBricks® vectors based on the SV1 and TG1  
242 actinophage integrases that could be used for the expression of gene circuits from orthogonal  
243 promoters (Supplementary Figure 1). pENSV1 incorporates the SV1 actinophage integrase, the  
244 *attP* site, *oriT* for mobilization from *E. coli* ET12567/pUZ8002 via conjugation, and the *aadA*  
245 spectinomycin resistance gene for site-specific recombination into the chromosome.  
246 Simultaneously, pENTG1 incorporates the TG1 actinophage integrase, *oriT*, *attP* site, and the  
247 *vph* viomycin resistance gene for single-copy chromosomal engineering (Supplementary Figure  
248 1). In addition, we obtained the BioBrick-compatible vector pOSV808, which includes the VWB  
249 actinophage integrase, *attP* site, *oriT*, and the *amilCP* gene for screening of recombinant clones  
250 [37].

251 pENSV1, pENTG1, and pOSV808 were successfully transformed into *S. coelicolor*  
252 M1146 and *S. coelicolor* M1146::cos16F4iE via intergeneric conjugation. This demonstrated  
253 that these vectors could potentially be useful for shuttling gene cassettes into *S. coelicolor* for  
254 pathway engineering. We next used these vectors to clone in different operons for substrate  
255 precursor engineering of **1**.

256  
257 ***Engineering precursor metabolite pools to increase production titers of 1***

258 Next, we decided to use the pENSV1, pENTG1, and pOSV808 expression vectors to  
259 engineer precursor substrate pools within *S. coelicolor* M1146::cos16F4iE to produce higher  
260 levels of **1**. Substrate precursor engineering has been used to increase the production of a

261 variety of aromatic polyketides, including mithramycin, tetracenomycin C, actinorhodin,  
262 nogalamycin, and steffimycin<sup>[39,40]</sup>. The proposed biosynthesis of **1** requires condensation of 1  
263 molecule of acetyl-CoA and 9 molecules of malonyl-CoA via the ElmKLM minimal PKS (Figure  
264 2). Cyclases ElmNI and ElmJ generate the tricyclic tetracenomycin F2, which is cyclized by ElmI  
265 to form tetracenomycin F1, oxidatively modified by ElmH to form tetracenomycin D3, and  
266 undergoes consecutive O-methylations at the 3-O-position by ElmNII and at the 9-O-position by  
267 ElmP<sup>[41]</sup>. ElmG carries out a triple hydroxylation of the penultimate intermediate to form **1**<sup>[10]</sup>.  
268 We engineered three different gene cassettes to enhance substrate precursor pools for **1**. First,  
269 we engineered the *Streptomyces coelicolor* M145 acetyl-CoA carboxylase complex (i.e.  
270 *accA2BE*) under the control of the constitutive *ermE*\**p* promoter to enhance condensation of  
271 acetyl-CoA to malonyl-CoA (Figure 2). This strategy has been successfully used to enhance the  
272 production of actinorhodin by 6-fold<sup>[30]</sup>. Second, we engineered the acyltransferase *sco6196*  
273 under the control of the constitutive *ermE*\**p* promoter to increase carbon flux from  
274 triacylglycerols to beta-oxidation, which increases acetyl-CoA precursor supply<sup>[31]</sup>. polyketide  
275 biosynthesis when it is most active. *Sco6196* is a highly active acyltransferase that plays a  
276 major role as a “metabolic switch” during stationary phase, which mobilizes triacylglycerols to  
277 the beta-oxidation machinery to produce acetyl-CoA, which is then diverted towards polyketide  
278 biosynthesis<sup>[31]</sup> Lastly, we decided to engineer the *vhb* hemoglobin gene from the obligate  
279 aerobe *Vitreoscilla stercoraria* under the control of its oxygen-sensitive promoter. Expression of  
280 *vhb* in *S. coelicolor* M1146::cos16F4iE is expected to enhance biomass formation and  
281 availability of oxygen for the electron transport chain.

282 We also hypothesized that the expression of different gene cassettes from unique loci in  
283 the *S. coelicolor* chromosome might lead to the identification of “chromosomal position effects”,  
284 due to some regions of the chromosome being transcribed more frequently than other regions,  
285 which could lead to improved product formation. This strategy was exploited by Bilyk et al. to  
286 array production of aranciamycin over an 8-fold range dependent on the *attB* site of

287 recombination<sup>[42]</sup>. We cloned *vhb*, *ermE*\**p-accA2BE*, and *ermE*\**p-sco6196* onto pENSV1,  
288 pENTG1, and pOSV808 to splice the gene constructs into the SV1, TG1, and VWB *attB* sites of  
289 *S. coelicolor*. We observed that the engineering the integrating cassettes into the different *attB*  
290 sites resulted in decreasing rank order of **1** production titer as follows: SV1 > VWB > TG1. The  
291 recombinant strains were grown in SG liquid media in shake flasks for 5 days. After five days,  
292 biomass measurements were conducted and the cultures were extracted to determine **1**  
293 production titers via HPLC-MS analysis (Figure 3). Each experiment used 4 – 6 biological  
294 replicates, which were compared to a standard curve of authentic **1** (Figure 4). The recombinant  
295 strains harboring pENSV1-*vhb*, pENSV1-*ermE*\**p-accA2BE*, and pENSV1-*ermE*\**p-sco6196*  
296 exhibited the highest increases in **1** product titer (Figure 3). The cos16F4iE line produced a  
297 mean of 166 mg/L **1**, whereas the cos16F4iE::pENSV1-*vhb* line exhibited 32% increased  
298 production of **1** (e.g.  $220.3 \pm 15.3$  mg/L,  $p = 0.0168$ ), the cos16F4iE::pENSV1-*sco6196* line  
299 exhibited 2.2-fold increased production of **1** (e.g.  $366.6 \pm 67.8$  mg/L,  $p=0.0465$ ), and  
300 cos16F4iE::pENSV1-*accA2BE* line exhibited the greatest increase in production titer of **1** of 2.4-  
301 fold (e.g.  $403 \pm 83.6$  mg/L,  $p=0.0304$ ) (Figure 3). HPLC-MS analysis of the different lines  
302 revealed an increase in production of **1**, and significant production of the penultimate  
303 intermediate tetracenomycin B3 (Figure 4). In addition, the transformation of pOSV808-based  
304 constructs resulted in statistically significant increases in titer of **1**. The cos16F4iE::pOSV808-  
305 *vhb* strain produced  $224.5 \pm 18.68$  mg/L of **1** ( $p = 0.0415$ ), cos16F4iE::pOSV808-*sco6196*  
306 produced  $249.2 \pm 11.88$  mg/L of **1** ( $p = 0.0007$ ), and cos16F4iE::pOSV808-*accA2BE* produced  
307  $327.3 \pm 40.2$  mg/L of **1** ( $p = 0.0131$ ). Surprisingly, engineering of pENTG1-based constructs  
308 resulted in statistically significant decreases in **1** production for all combinations attempted. One  
309 possible explanation for this could be that recombination of genes into the TG1 *attB* site could  
310 be deleterious for the growth of the integrants. TG1 integrates into *sco3658*, which encodes an  
311 aminotransferase<sup>[43]</sup>. In addition, no statistically significant differences were detected in biomass  
312 between the control line and the experimental lines, except for a decrease in biomass for the

313 cos16F4iE::pENTG1-*vhb* line ( $p = 0.0039$ ). This result demonstrates that the engineering of  
314 specific genes into different *attB* sites may have unanticipated effects on the growth of the  
315 strain, therefore, interrogation of several different *attB* sites might be required to identify the  
316 optimal chromosomal locus for expression of a given gene cassette.

317

### 318 ***Engineering of tetracenomyacin analogs and biosynthesis of tetracenomyacin X***

319 We decided to employ our improved production strains for the generation of  
320 tetracenomyacin analogs **2 - 4** <sup>[3,7,44]</sup>. The heterologous production of **2** and **3** which feature  
321 multiple *O*-methylations, and **4**, which features an additional hydroxyl group, could be useful for  
322 downstream structure-activity relationships studies (Figure 1). The biosynthesis for **2** diverges  
323 from **1** at tetracenomyacin B3: TcmO catalyzes *O*-methylation at the 8-position to form  
324 tetracenomyacin E, which is *O*-methylated at the 9-position by ElmP (i.e., TcmP homolog from *S.*  
325 *olivaceus* Tü 2353) to afford tetracenomyacin A2, which is hydroxylated at 4, 4a, and 12a  
326 positions by ElmG (i.e., TcmG homolog from *S. olivaceus* Tü 2353) (Figure 2). **1** biosynthesis  
327 does not undergo 8-*O*-methylation (since the 8-position is glycosylated by ElmGT), therefore,  
328 tetracenomyacin B3 is *O*-methylated at 9-position by ElmP then hydroxylated by ElmG to afford  
329 **1**. In summation, **1** is a shunt product with respect to the 8-*O*-methyltransferase TcmO, and the  
330 capacity of the elloramycin pathway enzymes to modify late-stage noncanonical tetracenomyacin  
331 substrates is unknown. In specific, the capability for ElmP to *O*-methylate tetracenomyacin E or  
332 ElmG to hydroxylate tetracenomyacin A2 to **2** is uncertain.

333 To test this hypothesis, we synthesized a codon-optimized version of the *tcmO* gene  
334 from the *S. glaucescens* GLA.0 pathway and expressed it under the control of the *sf14p*  
335 promoter in a pENSV1 vector in *S. coelicolor* M1146::cos16F4iE and *S. coelicolor*  
336 M1146::cos16F4iE::pOSV808-*accA2BE*. Both strains accumulated minor quantities of **2** as  
337 determined via comparison to an authentic standard of **2** ( $t_R = 9.39$  min) (Figure 5). We also  
338 sought to characterize the recently sequenced *tcmO* homolog from the **3** producer

339 *Amycolatopsis spp.* A23. We synthesized the codon-optimized version of the *tcmO* homolog  
340 from *Amycolatopsis spp.* A23 and similarly expressed it under the control of the *sf14p* promoter  
341 in a pENSV1 vector in *S. coelicolor* M1146::cos16F4iE and *S. coelicolor* M1146::cos16F4iE  
342 ::pOSV808-*accA2BE*. Again, both strains accumulated minor quantities of **2** as expected. This  
343 result shows that the *tcmO* homolog from *Amycolatopsis spp.* A23 encodes a tetracenomycin  
344 B3 8-*O*-methyltransferase. In addition, this result demonstrates that ElmP is capable of *O*-  
345 methylating tetracenomycin E and ElmG is flexible enough to convert tetracenomycin A2 to **2**. It  
346 was difficult to determine the production titer for these metabolites since the amount of **2**  
347 produced by each strain was <1% of the total amount of TCMs detected in the HPLC  
348 chromatogram. We were able to quantify relative production based on filtering the data in single-  
349 ion monitoring (SIM) in ESI negative ionization mode by searching for the [M-H] = 471 *m/z* ion.

350 Secondly, we decided to build on this previous result by incorporating the *urdE*  
351 oxygenase from the urdamycin pathway to hydroxylate **2** to **4** (Figure 2). UrdE was previously  
352 shown to accept **2** as an alternative substrate to its preferred angucyclinone substrate and can  
353 carry out hydroxylation at the 6-position of **2**<sup>[44]</sup>. We synthesized a codon-optimized version of  
354 *urdE* and cloned it under the *p* promoter into our pENSV1-*sf14p-tcmO* vector and expressed it  
355 in *S. coelicolor* M1146::cos16F4iE. Analysis of methanolic extracts from this strain resulted in  
356 the detection of **4** in SIM ESI positive ion mode using the [M-H] = 489 *m/z* ion as compared to  
357 an authentic standard of **4** (*t<sub>R</sub>* = 9.64 min) (Figure 5). The yield of this compound was very low,  
358 <1% of total TCMs, most likely owing to the relatively high level of metabolic flux towards **1**  
359 production. All attempts to transform the pENSV1-*sf14p-tcmO-sf14p-urdE* construct into *S.*  
360 *coelicolor* M1146::cos16F4iE::pOSV808 resulted in transformants that failed to grow on agar  
361 plates. One possible explanation for this observation could be that the ElmE elloramycin  
362 permease does not actively transport **4** outside of the cell, which could lead to toxicity due to the  
363 intracellular accumulation of **4**.

364 Thirdly, we decided to investigate the biosynthesis of **3**, which is previously  
365 uncharacterized. We hypothesized that an S-adenosyl-L-methionine-dependent 12-O-  
366 methyltransferase (i.e. SAM-dependent O-MT) methylates **2** to **3** (Figure 2). Further  
367 investigation in SIM ESI negative ion mode of the extracts from *S. coelicolor*  
368 M1146::cos16F4iE::pENSV1-*tcmO* revealed the presence of another methylated  
369 tetracenomycin with a mass of 486 *amu* and a later elution profile than **2** ( $t_R = 10.15$  min)  
370 (Figure 4). We identified the peak as **3** as compared to an authentic standard. This result  
371 demonstrates that the elloramycin 12-O-methyltransferase, ElmD, is capable of methylating **2** to  
372 form **3**. Knowing that the **3** gene cluster from *Amycolatopsis* spp. A23 would likely include an  
373 ElmD paralogue, we conducted a translated nucleotide basic local alignment search tool  
374 (BLASTX®) search of the *Amycolatopsis* spp. A23 genome with the ElmD nucleotide sequence  
375 as a search query. The search resulted in the identification of a 296 amino acid SAM-dependent  
376 O-MT (Accession Number WP\_155542896.1) with significant sequence homology (e.g. 54%  
377 identical/67% similar) to ElmD. We decided to call this enzyme TcmD, and we proceeded to  
378 synthesize a codon-optimized version of *tcmD* for co-expression in our pENSV1-*sf14p-tcmO*  
379 construct. We cloned *tcmD* under a copy of an additional *sf14p* promoter and spliced it at the 3'-  
380 end of *tcmO*. We expressed the resulting pENSV1-*sf14p-tcmO-sf14p-tcmD* construct in both *S.*  
381 *coelicolor* M1146::cos16F4iE and *S. coelicolor* M1146::cos16F4iE::pOSV808-*accA2BE* (Figure  
382 5). While quantification of the production titer of **3** was not possible due to the low level of  
383 production, <1% of all TCMs, we were able to determine relative production amounts of **2** and **3**  
384 via intensity counts from the mass spectrometer. Expression of *tcmO* itself lead to  
385 approximately equimolar production of **2** and **3** in extracts from *S. coelicolor* M1146::cos16F4iE  
386 ::pOSV808-*accA2BE*::pENSV1-*sf14p-tcmO*. Co-expression of *tcmD* resulted in a ten-fold  
387 increase in **3** production titer, as well as a significant increase in **2** production. The highest  
388 yields resulted from co-expression of *tcmO* and *tcmD* in the line harboring the acetyl-CoA  
389 carboxylase complex, which highlights the fact that the increased production of **2** and **3** was due



390 to the increased substrate precursor pools and resultant metabolic flux through the engineered  
391 tetracenomycin pathway in this strain. In summation, to the best of our knowledge, this is the  
392 first report in which *tcmD* has been characterized via heterologous expression as the 12-O-MT  
393 responsible for the biosynthesis of **3**.

394

## 395 Discussion

396 In this report, we developed a series of orthogonal integrating vectors based on the SV1,  
397 TG1, and VWB actinophage integrases and used these vectors to engineer in *vhb* hemoglobin,  
398 *accA2BE* acetyl-CoA carboxylase, and *sco6196* acyltransferase gene cassettes. This  
399 multiplexed metabolic engineering strategy resulted in improved production strains of *S.*  
400 *coelicolor* M1146::cos16F4iE, especially those lines expressing *accA2BE* or *sco6196*, which  
401 resulted in the highest production titer of 486 mg/L. Previously, Li et al. engineered the **2**  
402 biosynthetic pathway in a knockout mutant of the industrial monensin producer, *Streptomyces*  
403 *cinnomonaeus*<sup>[45]</sup>. The highest reported production of **3** in this strain was 440 mg/L, which  
404 indicates that our production methodology compares favorably with this industrial host.  
405 Furthermore, industrial hosts often result from iterative cycles of random mutagenesis and  
406 screening for mutants with desired production characteristics. Our methodology provides a  
407 rational approach for improving type II polyketide production titers based on several  
408 complementary approaches, including overexpression of the acetyl-CoA carboxylase complex  
409 to enhance malonyl-CoA concentration, overexpression of *sco6196* to enhance acetyl-CoA  
410 levels, and overexpression of the *vhb* hemoglobin to enhance oxygen concentrations in  
411 submerged liquid fermentation, which could boost cellular metabolism, as well as enhance  
412 biosynthetic oxygenation steps.

413 We used this enhanced production platform as a showcase for combinatorial  
414 biosynthesis of tetracenomycin analogs **2 – 4**. These analogs are thought to be more valuable  
415 anticancer compounds than **1**, owing to the O-methyl groups at 8- and 12-positions, which

416 enhance binding to the large ribosomal polypeptide exit channel <sup>[3,5]</sup>. Engineering of *tcmO*  
417 orthologs from two different actinomycetes, *S. glaucescens* GLA.0 and *Amycolatopsis* sp. A23  
418 resulted in the production of **2** and **3**. The heterologous expression of *urdE* also resulted in the  
419 production of **4**, as previously described <sup>[44]</sup>. Most importantly, the heterologous expression of  
420 the newly characterized *tcmD* gene resulted in a ten-fold increase in production of **3**, which  
421 provides good evidence for its role as a tetracenomycin C 12-*O*-methyltransferase in the **3**  
422 biosynthetic pathway. The utility of this production method is diminished, however, by the  
423 significant metabolic flux away from **2** – **4** production to production of **1** at the tetracenomycin B3  
424 step. Tetracenomycin B3 likely represents a branch point for the glycosylated elloramycins and  
425 methylated tetracenomycins. Future studies should focus on engineering combinations of *tcmD*  
426 and *urdE* in the *Streptomyces glaucescens* GLA.0 tetracenomycin C wildtype producer. In this  
427 strain, we expect that higher production titers of **3** and **4** could be realized, in addition to the  
428 potential for producing new tetracenomycin analogs.  
429

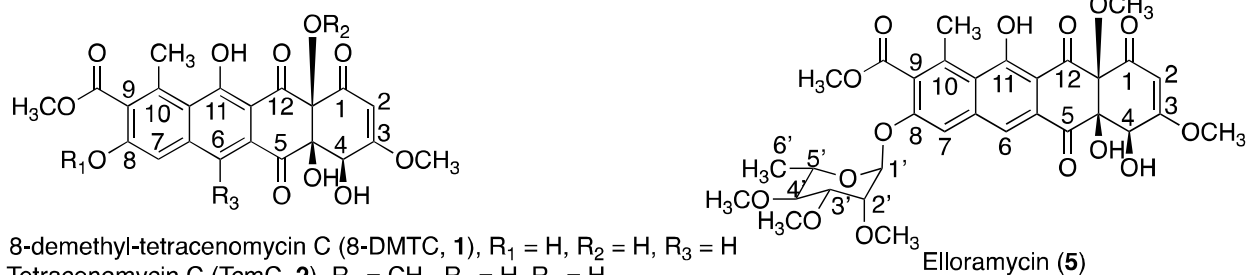

430

431 **Figure 1. Structures of the antitumor tetracenomycins.**

432

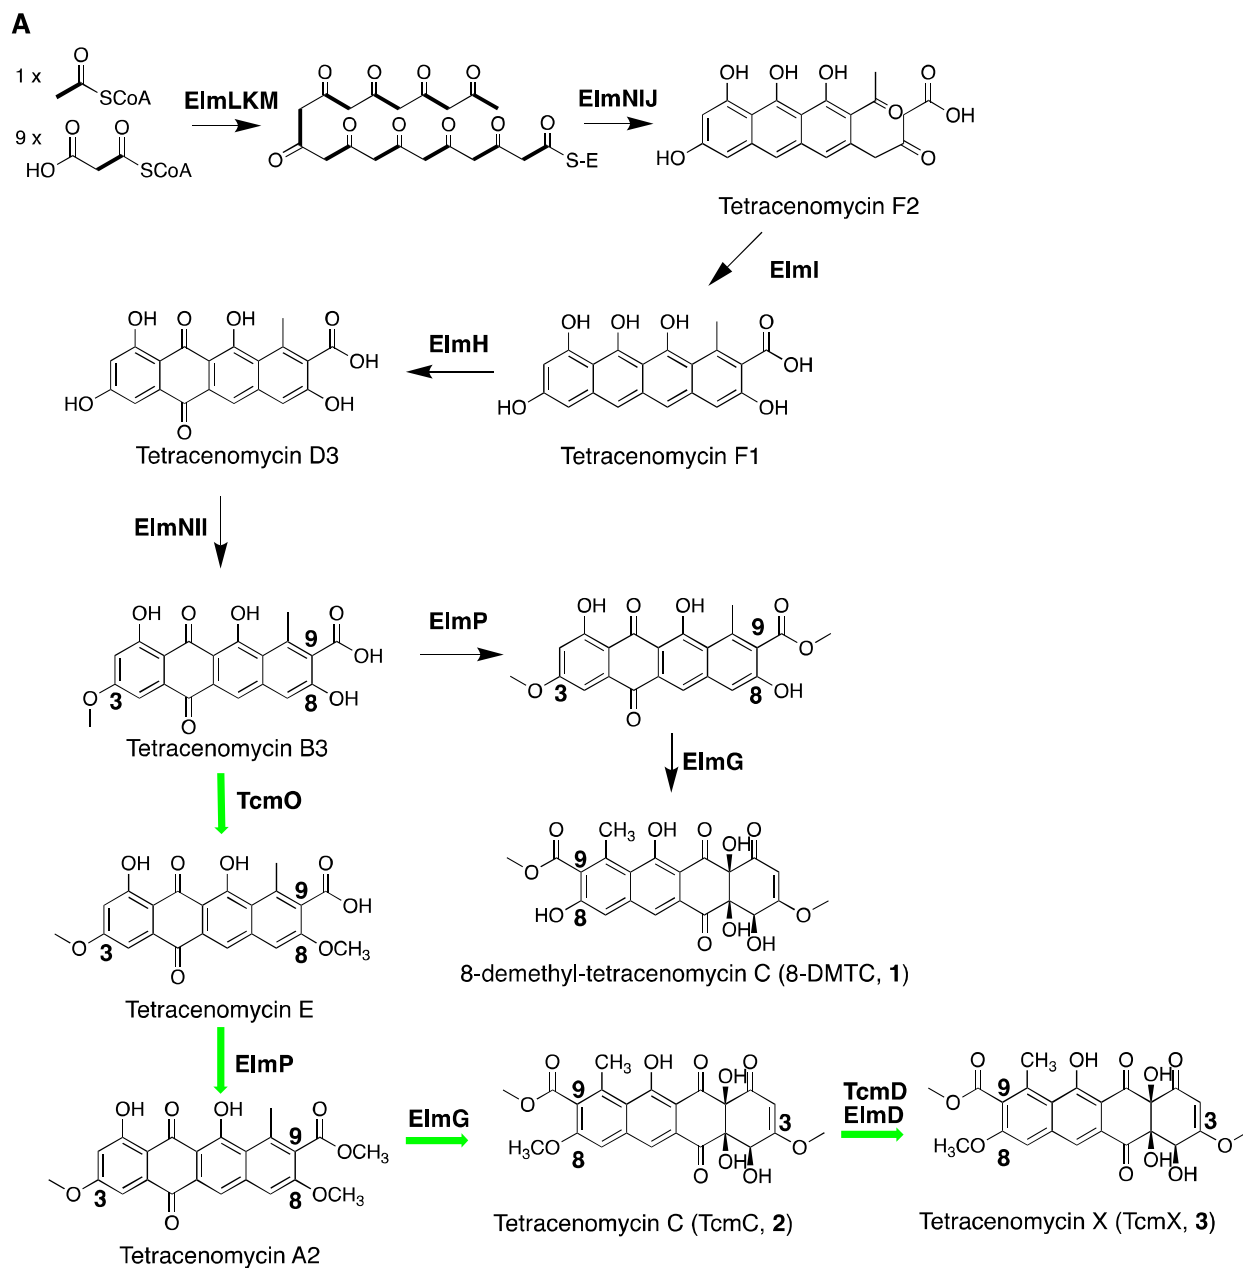

433

434 **Figure 2. Proposed biosynthetic steps for the biosynthesis of the tetracenomycins.** The

435 native **1** biosynthetic pathway is indicated in black arrows, whereas the engineered

436 tetracenomycin bypass pathway is indicated with bold green arrows.

437

**A**  
M1146::cos16F4iE pENSV1 Titers

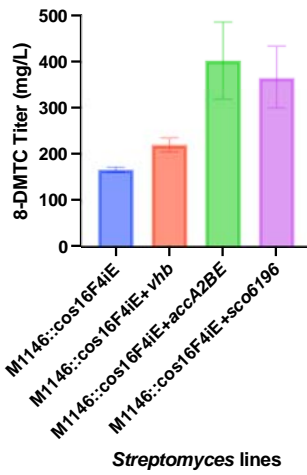

**B**  
M1146::cos16F4iE pENSV1 Biomass

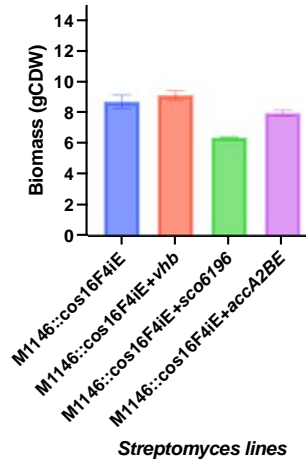

**C**  
M1146::cos16F4iE pENTG1 Titers

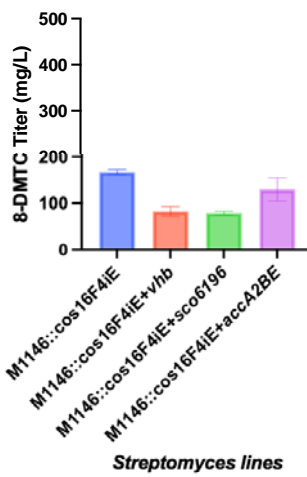

**D**  
M1146::cos16F4iE pENTG1 Biomass

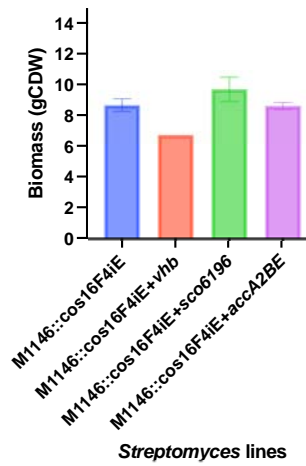

**E**  
M1146::cos16F4iE pOSV808 Titers

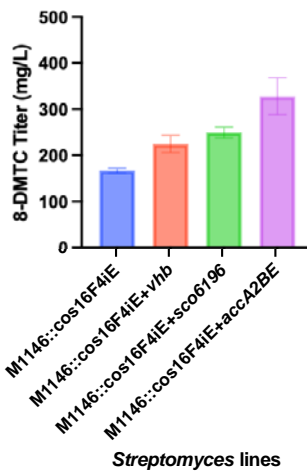

**F**  
M1146::cos16F4iE pOSV808 Biomass

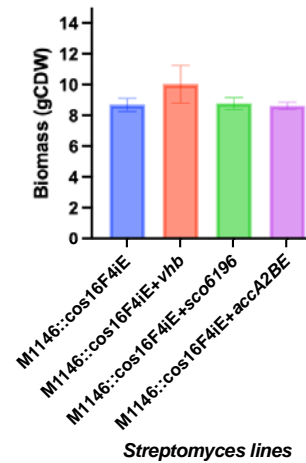

439 **Figure 3 Substrate precursor engineering of *S. coelicolor* M1146::cos16F4iE for**  
440 **production of 1.** (A) Production titers of 8-DMTC from lines engineered with pENSV1::v**h**b,  
441 pENSV1::accA2BE, or pENSV1::sco6196. (B) Biomass measurements of lines engineered with  
442 pENSV1-based vectors. (C) Production titers of **1** from lines engineered with pENTG1::v**h**b,  
443 pENTG1::accA2BE, or pENTG1::sco6196. (D) Biomass measurements of lines engineered with  
444 pENTG1-based vectors. (E) Production titers of **1** from lines engineered with pOSV808::v**h**b,  
445 pOSV808::accA2BE, or pOSV808::sco6196. (F) Biomass measurements of lines engineered  
446 with pOSV808-based vectors. Experiments were conducted with 4 – 6 biological replicates.  
447 Experimental groups were compared using a t-test to determine statistical significance ( $p <$   
448 0.05).  
449

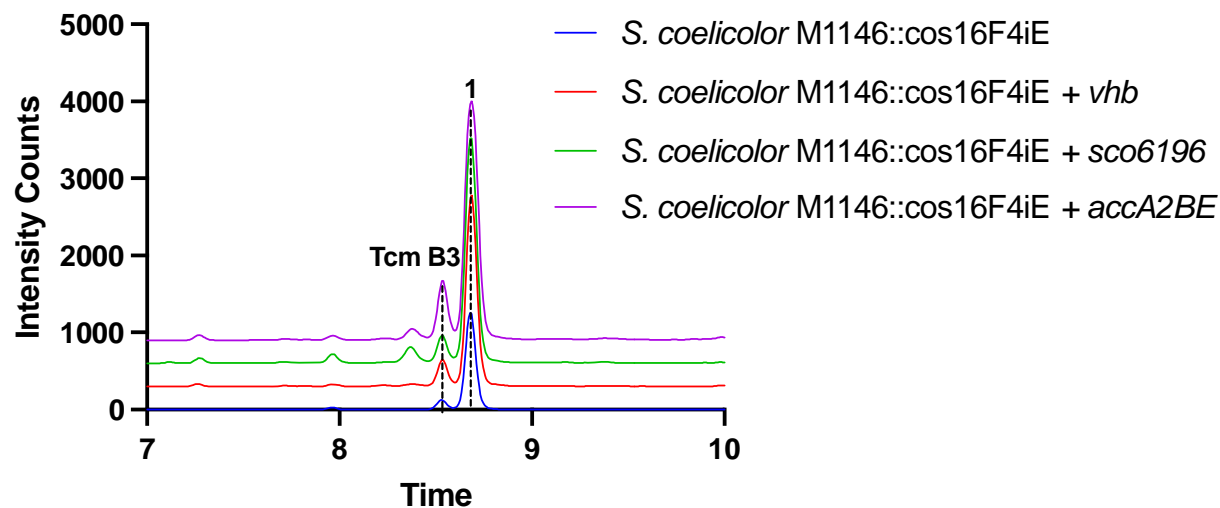

450

451 **Figure 4 Increased production of 1 via the metabolic engineering of substrate precursor**

452 **pools.** Production of 1 was increased via the expression of a chromosomally-integrated copy of

453 *Vitreoscilla stercoraria* hemoglobin (*vhb*, red trace), *S. coelicolor* *sco6196* acyltransferase

454 (*sco6196*, green trace), or the *S. coelicolor* acetyl-CoA carboxylase complex (*accA2BE*, purple

455 trace).

456

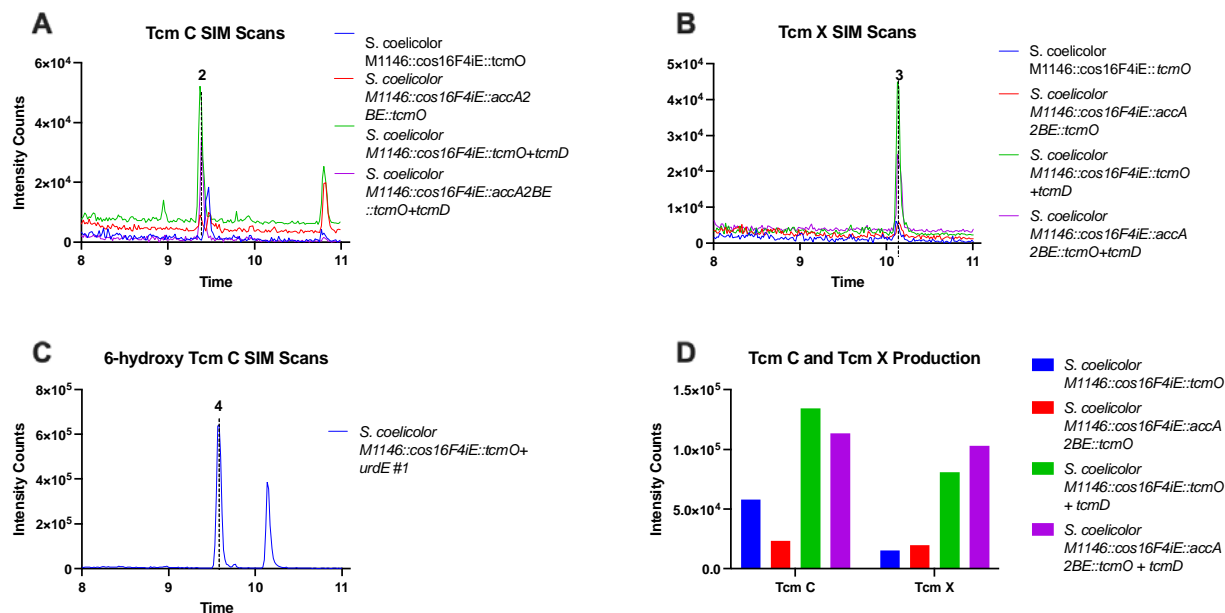

457

458 **Figure 5 Production of tetracenomycin analogs.** (Panel A) Chromatogram traces of lines

459 producing **2** as analyzed in ESI-MS negative ion SIM mode:  $[M-H] = 471$   $m/z$ . (Panel B)

460 Chromatogram traces of lines producing **3** as analyzed in ESI-MS negative ion SIM mode:  $[M-H]$

461 = 485  $m/z$ . (Panel C) Chromatogram traces of lines producing **4** as analyzed in ESI-MS positive

462 ion SIM mode:  $[M+H] = 489$   $m/z$ . (Panel D) Quantification of relative amounts of **2** and **3** from

463 different production lines based on intensity counts in ESI-MS negative ion SIM mode.

464



465 **Acknowledgments**

466 Research reported in this publication was supported by the National Cancer Institute of the  
467 National Institutes of Health under Award No. R15CA252830 (to S.E.N.) and the National  
468 Science Foundation under Grant No. ENG-2015951 (to S.E.N.). The authors also acknowledge  
469 the Ferris State University College of Pharmacy and the College of Pharmacy Alumni Board for  
470 financial support for the purchase of the Agilent 1260 Infinity II iQ HPLC-MS instrument used in  
471 this study. The authors also thank Dr. Jose Salas (University of Oviedo, Spain) for cosmid  
472 cos16F4iE. The authors also acknowledge Dr. Juan Pablo-Escribano and Dr. Mark Buttner  
473 (John Innes Center, Norwich, United Kingdom) for the provision of *Streptomyces coelicolor*  
474 M1146. The authors also thank Dr. Khaled A. Shaaban of the Center for Pharmaceutical  
475 Research and Innovation, University of Kentucky College of Pharmacy for providing chemical  
476 standards for **1** and **4**. The authors also acknowledge the National Cancer Institute  
477 Developmental Therapeutics Program for providing chemical standards for **2** and **3**.

478  
479 S.E.N. conceptualized the study, acquired funding, supervised all aspects of the study, and  
480 wrote the manuscript. K.V.B., J.T.N., N.M.G., and K.K.R. carried out experiments (equal). All  
481 authors reviewed the data and edited the manuscript.

482

483 **Conflict of Interest**

484 Material published in this report is covered under U.S. Patent Application No. 16/015,821 to  
485 Ferris State University.

486

## 487 References

- 488 1. EGERT, E., NOLTEMEYER, M., SIEBERS, J., ROHR, J., & ZEECK, A. (2012). The structure of  
489 tetracenomycin C. *The Journal of Antibiotics*, 45(7), 1190–1192.  
490 <https://doi.org/10.7164/antibiotics.45.1190>
- 491 2. Zeeck, A., Reuschenbach, P., ZÄHner, H., & Rohr, J. (1985). Metabolic products of  
492 microorganisms. 2251) elloramycin, a new anthracycline-like antibiotic from streptomyces  
493 olivaceus isolation, characterization, structure and biological properties. *The Journal of*  
494 *Antibiotics*, 38(10), 1291–1301. <https://doi.org/10.7164/antibiotics.38.1291>
- 495 3. Rohr, J., & Zeeck, A. (1990). Structure-activity relationships of elloramycin and  
496 tetracenomycin C. *The Journal of Antibiotics*, 43(9), 1169–1178.  
497 <https://doi.org/10.7164/antibiotics.43.1169>
- 498 4. Qiao, X., Gan, M., Wang, C., Liu, B., Shang, Y., Li, Y., & Chen, S. (2019). Tetracenomycin X  
499 Exerts Antitumour Activity in Lung Cancer Cells through the Downregulation of Cyclin D1.  
500 *Marine Drugs*, 17(1), 63. <https://doi.org/10.3390/md17010063>
- 501 5. Osterman, I. A., Wieland, M., Maviza, T. P., Lashkevich, K. A., Lukianov, D. A., Komarova, E. S.,  
502 Zakalyukina, Y. v., Buschauer, R., Shiriaev, D. I., Leyn, S. A., Zlamal, J. E., Biryukov, M. v.,  
503 Skvortsov, D. A., Tashlitsky, V. N., Polshakov, V. I., Cheng, J., Polikanov, Y. S., Bogdanov, A.  
504 A., Osterman, A. L., ... Sergiev, P. v. (2020). Tetracenomycin X inhibits translation by  
505 binding within the ribosomal exit tunnel. *Nature Chemical Biology*, 1–7.  
506 <https://doi.org/10.1038/s41589-020-0578-x>
- 507 6. Ortseifen, V., Kalinowski, J., Pühler, A., & Rückert, C. (2017). The complete genome sequence  
508 of the actinobacterium *Streptomyces glaucescens* GLA.O (DSM 40922) carrying gene  
509 clusters for the biosynthesis of tetracenomycin C, 5'-hydroxy streptomycin, and acarbose.  
510 *Journal of Biotechnology*, 262, 84–88. <https://doi.org/10.1016/j.jbiotec.2017.09.008>
- 511 7. Motamedi, H., & Hutchinsont, C. R. (1987). Cloning and heterologous expression of a gene  
512 cluster for the biosynthesis of tetracenomycin C, the anthracycline antitumor antibiotic of  
513 *Streptomyces glaucescens* (antibiotic resistance/pigment production genes). In  
514 *Biochemistry* (Vol. 84).
- 515 8. Thompson, T. B., Katayama, K., Watanabe, K., Hutchinson, C. R., & Rayment, I. (2004).  
516 Structural and functional analysis of tetracenomycin F2 cyclase from *Streptomyces*  
517 *glaucescens*: A type II polyketide cyclase. *Journal of Biological Chemistry*, 279(36), 37956–  
518 37963. <https://doi.org/10.1074/jbc.M406144200>
- 519 9. Ames, B. D., Korman, T. P., Zhang, W., Smith, P., Vu, T., Tang, Y., & Tsai, S. C. (2008). Crystal  
520 structure and functional analysis of tetracenomycin ARO/CYC: Implications for cyclization  
521 specificity of aromatic polyketides. *Proceedings of the National Academy of Sciences of the*  
522 *United States of America*, 105(14), 5349–5354. <https://doi.org/10.1073/pnas.0709223105>
- 523 10. Shen, B., & R, H. (1994). Triple Hydroxylation of Tetracenomycin A2 to tetraenomycin C in  
524 *Streptomyces glaucescens*. *The Journal of Biological Chemistry*, 1326(25), 30726–30733.  
525 <http://www.jbc.org/content/269/48/30726.full.pdf>
- 526 11. Yue, S., Motamedi, H., Wendt-Pienkowski, E., & Hutchinson, C. R. (1986). Anthracycline  
527 Metabolites of Tetracenomycin C-Nonproducing *Streptomyces glaucescens* Mutants. In  
528 *JOURNAL OF BACTERIOLOGY*. <http://jb.asm.org/>

- 529 12. Decker, H., Rohr, J., Motamedi, H., Zähler, H., & Hutchinson, C. R. R. (1995). Identification  
530 of *Streptomyces olivaceus* Tü 2353 genes involved in the production of the polyketide  
531 elloramycin. In *Gene* (Vol. 166, Issue 1). Elsevier. <https://doi.org/10.1016/0378->  
532 1119(95)00573-7
- 533 13. Blanco, G., Patallo, E. P., Braña, A. F., Trefzer, A., Bechthold, A., Rohr, J., Méndez, C., & Salas,  
534 J. A. (2001). Identification of a sugar flexible glycosyltransferase from *Streptomyces*  
535 *olivaceus*, the producer of the antitumor polyketide elloramycin. *Chemistry & Biology*, 8(3),  
536 253–263. [https://doi.org/10.1016/S1074-5521\(01\)00010-2](https://doi.org/10.1016/S1074-5521(01)00010-2)
- 537 14. Rodríguez, L., Oelkers, C., Aguirrezabalaga, I., Braña, A. F., Rohr, J. J., Méndez, C., Salas, J. A.,  
538 Brana, a F., Rohr, J. J., Mendez, C., & Salas, J. A. (2000). Generation of hybrid elloramycin  
539 analogs by combinatorial biosynthesis using genes from anthracycline-type and macrolide  
540 biosynthetic pathways. *Journal of Molecular Microbiology and Biotechnology*, 2(3), 271–  
541 276. <http://www.ncbi.nlm.nih.gov/pubmed/10937435>
- 542 15. Rodríguez, L., Aguirrezabalaga, I., Allende, N., Braña, A. F., Méndez, C., & Salas, J. A. (2002).  
543 Engineering Deoxysugar Biosynthetic Pathways from Antibiotic-Producing Microorganisms.  
544 *Chemistry & Biology*, 9(6), 721–729. [https://doi.org/10.1016/s1074-5521\(02\)00154-0](https://doi.org/10.1016/s1074-5521(02)00154-0)
- 545 16. Pérez, M., Lombó, F., Baig, I., Braña, A. F., Rohr, J., Salas, J. A., & Méndez, C. (2006).  
546 Combinatorial biosynthesis of antitumor deoxysugar pathways in *Streptomyces griseus*:  
547 Reconstitution of “unnatural natural gene clusters” for the biosynthesis of four 2,6-D-  
548 dideoxyhexoses. *Applied and Environmental Microbiology*, 72(10), 6644–6652.  
549 <https://doi.org/10.1128/AEM.01266-06>
- 550 17. Eric Nybo, S., Shabaan, K. A., Kharel, M. K., Sutardjo, H., Salas, J. A., Méndez, C., & Rohr, J.  
551 (2012). Ketoolivosyl-tetracenomycin C: A new ketosugar bearing tetracenomycin reveals  
552 new insight into the substrate flexibility of glycosyltransferase ElmGT. *Bioorganic and*  
553 *Medicinal Chemistry Letters*, 22(6), 2247–2250.  
554 <https://doi.org/10.1016/j.bmcl.2012.01.094>
- 555 18. Pérez, M., Lombó, F., Zhu, L., Gibson, M., Braña, A. F., Rohr, J., Salas, J. A., & Méndez, C.  
556 (2005). Combining sugar biosynthesis genes for the generation of <sc>|</sc> - and  
557 <sc>d</sc> -amicetose and formation of two novel antitumor tetracenomycins. *Chem.*  
558 *Commun.*, 0(12), 1604–1606. <https://doi.org/10.1039/B417815G>
- 559 19. Fischer, C., Rodríguez, L., Patallo, E. P., Lipata, F., Braña, A. F., Méndez, C., Salas, J. A., &  
560 Rohr, J. (2002). Digitoxosyltetracenomycin C and glucosyltetracenomycin C, two novel  
561 elloramycin analogues obtained by exploring the sugar donor substrate specificity of  
562 glycosyltransferase ElmGT. *Journal of Natural Products*, 65(11), 1685–1689.  
563 <https://doi.org/10.1021/np020112z>
- 564 20. Lombó, F., Gibson, M., Greenwell, L., Braña, A. F., Rohr, J., Salas, J. A., & Méndez, C. (2004).  
565 Engineering biosynthetic pathways for deoxysugars: branched-chain sugar pathways and  
566 derivatives from the antitumor tetracenomycin. *Chemistry & Biology*, 11(12), 1709–1718.  
567 <https://doi.org/10.1016/j.chembiol.2004.10.007>
- 568 21. Birch, A., Hausler, A., & Hutter, R. (1990). *Genome Rearrangement and Genetic Instability in*  
569 *Streptomyces spp* (Vol. 172, Issue 8). <http://jb.asm.org/>
- 570 22. Kormanec, J., Rezuchova, B., Homerova, D., Csolleiova, D., Sevcikova, B., Novakova, R., &  
571 Feckova, L. (2019). Recent achievements in the generation of stable genome  
572 alterations/mutations in species of the genus *Streptomyces*. In *Applied Microbiology and*

- 573 *Biotechnology* (Vol. 103, Issue 14, pp. 5463–5482). Springer Verlag.  
574 <https://doi.org/10.1007/s00253-019-09901-0>
- 575 23. Gomez-Escribano, J. P., & Bibb, M. J. (2011). Engineering *Streptomyces coelicolor* for  
576 heterologous expression of secondary metabolite gene clusters. *Microbial Biotechnology*,  
577 4(2), 207–215. <https://doi.org/10.1111/j.1751-7915.2010.00219.x>
- 578 24. Gregory, M. A., Till, R., & Smith, M. C. M. M. (2003). Integration site for *Streptomyces* phage  
579  $\phi$ BT1 and development of site-specific integrating vectors. *Journal of Bacteriology*,  
580 185(17), 5320–5323. <https://doi.org/10.1128/JB.185.17.5320-5323.2003>
- 581 25. Morita, K., Yamamoto, T., Fusada, N., Komatsu, M., Ikeda, H., Hirano, N., & Takahashi, H.  
582 (2009). The site-specific recombination system of actinophage TG1. *FEMS Microbiology*  
583 *Letters*, 297(2), 234–240. <https://doi.org/10.1111/j.1574-6968.2009.01683.x>
- 584 26. van Mellaert, L., Mei, L., Lammertyn, E., Schacht, S., & Anne, J. (1998). Site-specific  
585 integration of bacteriophage VWB genome into *Streptomyces venezuelae* and  
586 construction of a VWB-based integrative vector. *Microbiology*, 144(12), 3351–3358.  
587 <https://doi.org/10.1099/00221287-144-12-3351>
- 588 27. Fayed, B., Younger, E., Taylor, G., & Smith, M. C. M. (2014). A novel *Streptomyces* spp.  
589 integration vector derived from the *S. venezuelae* phage, SV1. *BMC Biotechnology*, 14(1),  
590 51. <https://doi.org/10.1186/1472-6750-14-51>
- 591 28. Khosla, C., & Bailey, J. E. (1988). The *Vitreoscilla* hemoglobin gene: Molecular cloning,  
592 nucleotide sequence and genetic expression in *Escherichia coli*. *MGG Molecular & General*  
593 *Genetics*, 214(1), 158–161. <https://doi.org/10.1007/BF00340195>
- 594 29. Magnolo, S. K., Leenutaphong, D. L., Demodena, J. A., Curtis, J. E., Bailey, J. E., Galazzo, J. L.,  
595 & Hughes, D. E. (1991). Actinorhodin production by *streptomyces coelicolor* and growth of  
596 *streptomyces lividans* are improved by the expression of a bacterial hemoglobin.  
597 *Bio/Technology*, 9(5), 473–476. <https://doi.org/10.1038/nbt0591-473>
- 598 30. Ryu, Y. G., Butler, M. J., Chater, K. F., & Lee, K. J. (2006). Engineering of primary  
599 carbohydrate metabolism for increased production of actinorhodin in *Streptomyces*  
600 *codicolor*. *Applied and Environmental Microbiology*, 72(11), 7132–7139.  
601 <https://doi.org/10.1128/AEM.01308-06>
- 602 31. Wang, W., Li, S., Li, Z., Zhang, J., Fan, K., Tan, G., Ai, G., Lam, S. M., Shui, G., Yang, Z., Lu, H.,  
603 Jin, P., Li, Y., Chen, X., Xia, X., Liu, X., Dannelly, H. K., Yang, C., Yang, Y., ... Zhang, L. (2020).  
604 Harnessing the intracellular triacylglycerols for titer improvement of polyketides in  
605 *Streptomyces*. *Nature Biotechnology*, 38(1), 76–83. [https://doi.org/10.1038/s41587-019-](https://doi.org/10.1038/s41587-019-0335-4)  
606 0335-4
- 607 32. Sambrook, J., & W Russell, D. (2001). Molecular Cloning: A Laboratory Manual. *Cold Spring*  
608 *Harbor Laboratory Press, Cold Spring Harbor, NY*, 999.  
609 [http://books.google.com/books?id=YTxKwWUiBeUC&printsec=frontcover%5Cnpapers2://](http://books.google.com/books?id=YTxKwWUiBeUC&printsec=frontcover%5Cnpapers2://publication/uuid/BBBF5563-6091-40C6-8B14-06ACC3392EBB)  
610 [publication/uuid/BBBF5563-6091-40C6-8B14-06ACC3392EBB](http://books.google.com/books?id=YTxKwWUiBeUC&printsec=frontcover%5Cnpapers2://publication/uuid/BBBF5563-6091-40C6-8B14-06ACC3392EBB)
- 611 33. MacNeil, D. J., Gewain, K. M., Ruby, C. L., Dezeny, G., Gibbons, P. H., & MacNeil, T. (1992).  
612 Analysis of *Streptomyces avermitilis* genes required for avermectin biosynthesis utilizing a  
613 novel integration vector. *Gene*, 111(1), 61–68. [https://doi.org/10.1016/0378-](https://doi.org/10.1016/0378-1119(92)90603-M)  
614 1119(92)90603-M

- 615 34. Kieser, T., Bibb, M. J., Buttner, M. J., Chater, K. F., & Hopwood, D. A. (2000). Practical  
616 Streptomyces Genetics. In *John Innes Centre Ltd.* (p. 529).  
617 <https://doi.org/10.4016/28481.01>
- 618 35. Knight, T. (2003). Idempotent Vector Design for Standard Assembly of Biobricks Idempotent  
619 Vector Design for Standard Assembly of Biobricks. *Structure*, 1–11.  
620 <https://doi.org/http://hdl.handle.net/1721.1/21168>
- 621 36. Shetty, R. P., Endy, D., & Knight, T. F. (2008). Engineering BioBrick vectors from BioBrick  
622 parts. *Journal of Biological Engineering*, 2(1), 5. <https://doi.org/10.1186/1754-1611-2-5>
- 623 37. Aubry, C., Pernodet, J. L., & Lautru, S. (2019). Modular and integrative vectors for synthetic  
624 biology applications in *Streptomyces* spp. *Applied and Environmental Microbiology*, 85(16).  
625 <https://doi.org/10.1128/AEM.00485-19>
- 626 38. Nakouti, I., & Hobbs, G. (2015). The Application of an On-Line Optical Sensor to Measure  
627 Biomass of a Filamentous Bioprocess. *Fermentation*, 1(1), 79–85.  
628 <https://doi.org/10.3390/fermentation1010079>
- 629 39. Zabala, D., Braña, A. F., Salas, J. A., & Méndez, C. (2016). Increasing antibiotic production  
630 yields by favoring the biosynthesis of precursor metabolites glucose-1-phosphate and/or  
631 malonyl-CoA in *Streptomyces* producer strains. *The Journal of Antibiotics*, 69(3), 179–182.  
632 <https://doi.org/10.1038/ja.2015.104>
- 633 40. Zabala, D., Braña, A. F., Flórez, A. B., Salas, J. A., & Méndez, C. (2013). Engineering precursor  
634 metabolite pools for increasing production of antitumor mithramycins in *Streptomyces*  
635 *argillaceus*. *Metabolic Engineering*, 20, 187–197.  
636 <https://doi.org/10.1016/j.ymben.2013.10.002>
- 637 41. Ramos, A., Lombo, F., Brana, A. F., Rohr, J., Mendez, C., & Salas, J. A. (2008). Biosynthesis of  
638 elloramycin in *Streptomyces olivaceus* requires glycosylation by enzymes encoded outside  
639 the aglycon cluster. *Microbiology*, 154(3), 781–788.  
640 <https://doi.org/10.1099/mic.0.2007/014035-0>
- 641 42. Bilyk, B., Horbal, L., & Luzhetskyy, A. (2017). Chromosomal position effect influences the  
642 heterologous expression of genes and biosynthetic gene clusters in *Streptomyces albus*  
643 J1074. *Microbial Cell Factories*, 16(1), 5. <https://doi.org/10.1186/s12934-016-0619-z>
- 644 43. Myronovskyi, M., & Luzhetskyy, A. (2013). Genome engineering in actinomycetes using site-  
645 specific recombinases. In *Applied Microbiology and Biotechnology* (Vol. 97, Issue 11, pp.  
646 4701–4712). <https://doi.org/10.1007/s00253-013-4866-1>
- 647 44. Decker, H., & Haag, S. (1995). Cloning and characterization of a polyketide synthase gene  
648 from *Streptomyces fradiae* Tü2717, which carries the genes for biosynthesis of the  
649 angucycline antibiotic urdamycin A and a gene probably involved in its oxygenation.  
650 *Journal of Bacteriology*, 177(21), 6126–6136. [https://doi.org/10.1128/jb.177.21.6126-](https://doi.org/10.1128/jb.177.21.6126-6136.1995)  
651 [6136.1995](https://doi.org/10.1128/jb.177.21.6126-6136.1995)
- 652 45. Li, C., Hazzard, C., Florova, G., & Reynolds, K. A. (2009). High titer production of  
653 tetracenomycins by heterologous expression of the pathway in a *Streptomyces*  
654 *cinnamomensis* industrial monensin producer strain. *Metabolic Engineering*, 11(6), 319–  
655 327. <https://doi.org/10.1016/j.ymben.2009.06.004>  
656

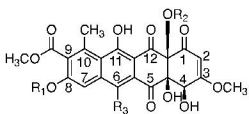

8-demethyl-tetracenomycin C (8-DMTC, **1**),  $R_1 = H$ ,  $R_2 = H$ ,  $R_3 = H$

Tetracenomycin C (TcmC, **2**),  $R_1 = CH_3$ ,  $R_2 = H$ ,  $R_3 = H$

Tetracenomycin X (TcmX, **3**),  $R_1 = CH_3$ ,  $R_2 = CH_3$ ,  $R_3 = H$

6-hydroxy tetracenomycin C (6-OH-TCMC, **4**),  $R_1 = CH_3$ ,  $R_2 = CH_3$ ,  $R_3 = OH$

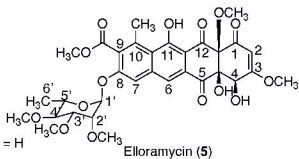

Elloramycin (**5**)

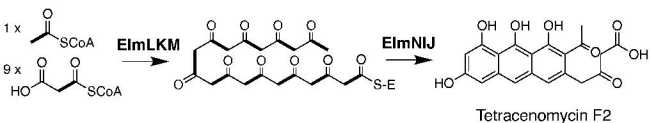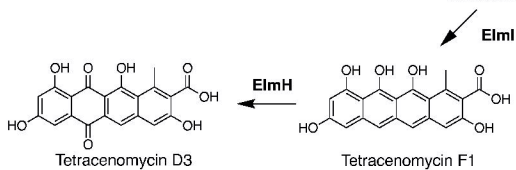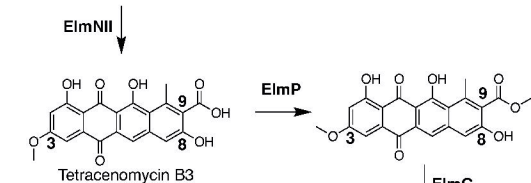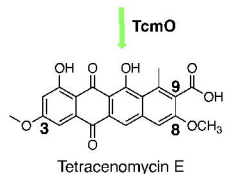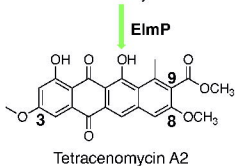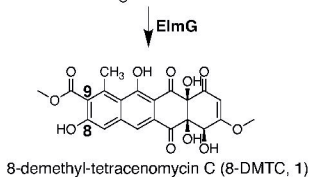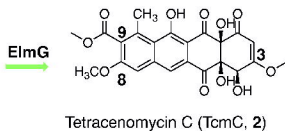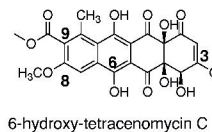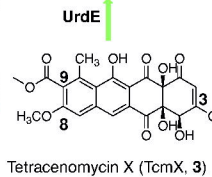

$\xrightarrow{\text{TcmD}}$

**A**  
M1146::cos16F4iE pENSV1 Titers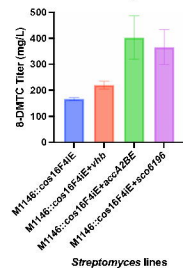**B**  
M1146::cos16F4iE pENSV1 Biomass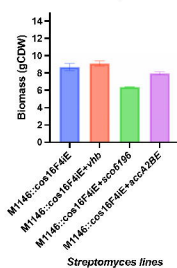**C**  
M1146::cos16F4iE pENTG1 Titers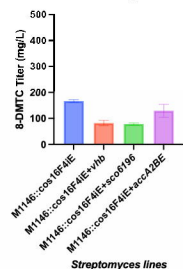**D**  
M1146::cos16F4iE pENTG1 Biomass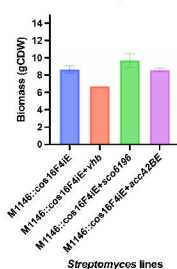**E**  
M1146::cos16F4iE pOSV808 Titers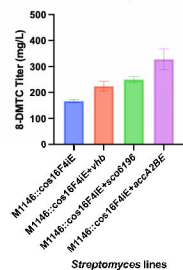**F**  
M1146::cos16F4iE pOSV808 Biomass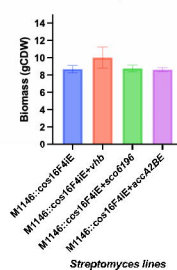



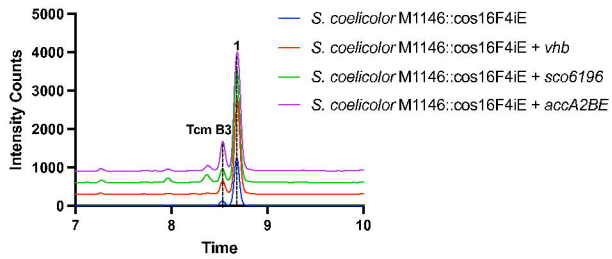

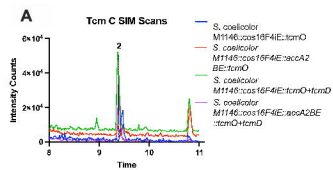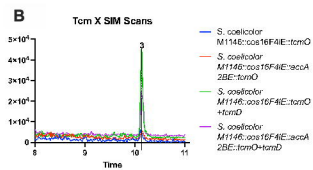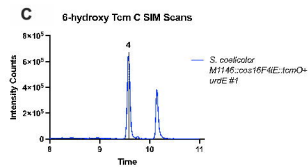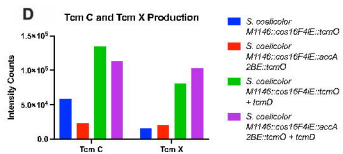

Source: http://biorxiv.org/content/10.1101/2021.07.23.453519v1.full.pdf
